# Supplementary material
Source: Royal Society of Chemistry journal article supplement (doi:10.1039/d6cp00003g)
Supplement: d6cp00003g1.pdf [file d6cp00003g1.pdf]

## Supporting Information

### The Entropic Role of Vacancy Defects in Governing Glass Formation within Zeolitic Imidazolate Frameworks

Zhongyong Zhang<sup>1,2,3</sup>, Bin Liu<sup>2</sup>, Shuqing Fang<sup>1,2</sup>, Wei Li<sup>4</sup>, Zuhao Shi<sup>2,\*</sup>, Neng Li<sup>1,2,3,\*</sup>

<sup>1</sup>State Key Laboratory of Advanced Technology for Float Glass, CNBM Research Institute for Advanced Glass Materials Group Co., Ltd, Bengbu 233010, China

<sup>2</sup>State Key Laboratory of Silicate Materials for Architectures, Wuhan University of Technology, Wuhan 430070, China

<sup>3</sup>Hubei Longzhong Laboratory, Xiangyang 441000, China

<sup>4</sup>School of Materials Science and Engineering, Smart Sensing Interdisciplinary Science Center, Nankai University & TKL of Metal and Molecule Based Material Chemistry, Tianjin, 300350, China

\*Corresponding Author: **Neng Li**, Email: [lineng@whut.edu.cn](mailto:lineng@whut.edu.cn); **Zuhao Shi**, Email: [zuhao17@whut.edu.cn](mailto:zuhao17@whut.edu.cn)

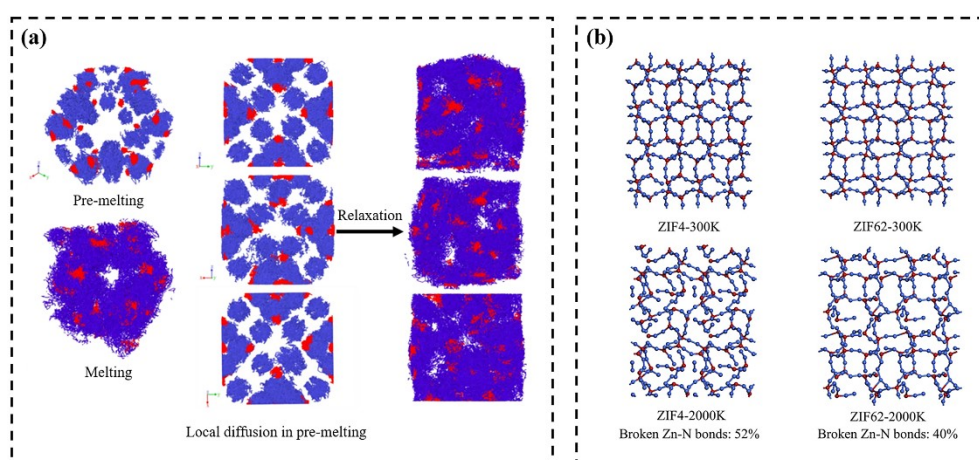

**Figure S1.** (a) Snapshots of thermal decomposition of ZIF-8, with red and blue representing the trajectories of metal atoms and organic linkers respectively, and (b) the proportion of Zn N bonds in ZIF-62 at different temperatures<sup>1</sup>.

#### Reference

- 1 Z. Shi, A. Arramel, T. D. Bennett, Y. Yue and N. Li, The deformation of short-range order leading to rearrangement of topological network structure in zeolitic imidazolate framework glasses, *ISCIENCE*, 2022, **25**(6), 104351.
